# Supplementary material for: Iron-optimized oxygen vacancy concentration to strengthen the electrocatalytic ability of the urea oxidation reaction
Source: Royal Society of Chemistry journal article supplement (doi:10.1039/d3cc03889k), 2023-01-01
Supplement: d3cc03889k1.pdf [file d3cc03889k1.pdf]

## Supplementary Information

# Iron-optimized Oxygen Vacancy Concentration to Strengthen the Electrocatalytic Ability of Urea Oxidation Reaction

Yingzhen Zhang <sup>1a</sup>, Wei Zhang <sup>1a</sup>, Yonggang Lei <sup>a</sup>, Jianying Huang <sup>a,b\*</sup>, Zhiqun Lin <sup>c\*</sup>, and  
Yuekun Lai <sup>a,b\*</sup>

<sup>a</sup> National Engineering Research Center of Chemical Fertilizer Catalyst (NERC-CFC), College of Chemical Engineering, Fuzhou University, Fuzhou 350116, P.R. China

<sup>b</sup> Qingyuan Innovation Laboratory, Quanzhou 362801, P.R. China

<sup>c</sup> Department of Chemical and Biomolecular Engineering, National University of Singapore, Singapore 117585, Singapore

<sup>1</sup> These authors contributed equally to this work.

\*Corresponding authors: [yklai@fzu.edu.cn](mailto:yklai@fzu.edu.cn); [jyhuang@fzu.edu.cn](mailto:jyhuang@fzu.edu.cn); [z.lin@nus.edu.sg](mailto:z.lin@nus.edu.sg)

## 1. Experimental

### 1.1. Materials

The chemicals utilized in the experiment were as follows: nickel(II) sulfate hexahydrate ( $\text{NiSO}_4 \cdot 6\text{H}_2\text{O}$ , AR, Aladdin), iron(III) nitrate nonahydrate ( $\text{Fe}(\text{NO}_3)_3 \cdot 9\text{H}_2\text{O}$ , 98.0%, Adamas-beta), selenium powder (Se, 99.99%, Aladdin), urea ( $\text{CH}_4\text{N}_2\text{O}$ , AR, Sinopharm), N,N-Dimethylformamide (DMF, AR, Sinopharm) and hydrazine hydrate ( $\text{N}_2\text{H}_4 \cdot \text{H}_2\text{O}$ , 85.0%, Sinopharm). These chemicals were used without undergoing any further purification processes. Nickel foam (NF) with a thickness of 2 mm served as the self-standing electrode substrate for the electrodeposition process.

### 1.2 Preparation of Catalysts

#### 1.2.1. Synthesis of $\text{NiSe}_2$ Nanorods

*In-situ* crafting of  $\text{NiSe}_2$  nanorods on NF surface by hydrothermal method involves the following steps. Firstly, the NF ( $4 \times 6 \text{ cm}^2$ ) was cleaned to remove any contaminants by 3.0 M HCl, absolute ethanol and  $\text{H}_2\text{O}$ , respectively. This cleaning process ensures a clean surface of NF for the subsequent deposition of  $\text{NiSe}_2$  nanorods. Secondly, the reaction mixture containing 100 mL of N,N-dimethylformamide (DMF), 0.84 mL of hydrazine, and 3.75 mmol of selenium powder was prepared. Thirdly, the resulting solution was then transferred into a 200 mL Teflon-polytetrafluoroethylene reactor, heated to  $180 \text{ }^\circ\text{C}$  and react for 1 h. After the reaction, naturally cool to ambient temperature. Then, the  $\text{NiSe}_2$  nanorods were washed several times by ultrapure water and absolute ethanol to remove any residual reactants, and dried under vacuum at  $60 \text{ }^\circ\text{C}$ .

#### 1.2.2. Synthesis of Iron-Modified $\text{Ni}(\text{OH})_2 @ \text{NiSe}_2$ Heterostructure

Iron-modified Ni(OH)<sub>2</sub>@NiSe<sub>2</sub> heterostructure (denoted as Fe-Ni(OH)<sub>2</sub>@NiSe<sub>2</sub>) was synthesized via water bath method. The following steps were involved in the synthesis. Firstly, the mixture solution consisting of 160 mM NiSO<sub>4</sub>·6H<sub>2</sub>O, 160 mM Fe(NO<sub>3</sub>)<sub>3</sub>·9H<sub>2</sub>O and 90 mM urea was prepared. Among them, Fe(NO<sub>3</sub>)<sub>3</sub>·9H<sub>2</sub>O plays a vital role in introducing iron into the Ni(OH)<sub>2</sub>@NiSe<sub>2</sub> heterostructure. Subsequently, the NiSe<sub>2</sub> was soaked in the above solution. Then, it was subjected to heating at 70 °C for a duration of 30 min. After the reaction, the obtained Fe-Ni(OH)<sub>2</sub>@NiSe<sub>2</sub> heterostructures were washed with ultrapure water to remove residual reactants. Finally, the heterostructures were dried under vacuum at 60 °C.

### 1.2.3 Synthesis of Ni(OH)<sub>2</sub>@NiSe<sub>2</sub> Heterostructure

The pristine Ni(OH)<sub>2</sub>@NiSe<sub>2</sub> was manufactured as a control sample by the same preparation procedure except that Fe(NO<sub>3</sub>)<sub>3</sub>·9H<sub>2</sub>O was not added.

### 1.3. Characterization

The morphology of the fabricated self-supporting electrodes was visualized using a Zeiss Sigma 300 field emission scanning electron microscope (FESEM). For higher-resolution images of the electrocatalysts, transmission electron microscopy (TEM) images were acquired using an FEI Tecnai G2-F20 s-twin microscope, operating at an accelerating voltage of 200 kV. X-ray diffraction (XRD) patterns were collected using an X'Pert3 Powder diffractometer with Cu K $\alpha$  radiation, operating at 40 kV and 40 mA. For chemical analysis, X-ray photoelectron spectroscopy (XPS) spectra were recorded using a K-Alpha+ instrument from Thermo Fisher Scientific, which employed a micro-focused, monochromatic Al-K $\alpha$  X-ray source with a spot size ranging from 30 to 500  $\mu$ m. Electron paramagnetic resonance (EPR) spectroscopy was gathered using a JEOL JES-FA200 instrument.

#### 1.4. Electrochemical Measurements

All electrochemical measurements, excluding electrochemical impedance spectroscopy (EIS), were conducted within a three-electrode system employing an electrochemical workstation (Versastat 3). The setup involved the utilization of the as-synthesized self-supporting electrode as the working electrode, a Pt plate as the counter electrode, and an Hg/HgO electrode as the reference electrode. The Nernst equation was applied to convert potential vs. Hg/HgO electrode to potential vs. reversible hydrogen electrode (RHE):

$$E_{\text{RHE}} = E_{\text{Hg/HgO}} + 0.0059 \times \text{pH} + 0.098 \text{ }^1$$

where  $E_{\text{RHE}}$  represents the potential vs. RHE, and  $E_{\text{Hg/HgO}}$  signifies the potential vs. Hg/HgO electrode. The electrolyte used for the experiments consisted of 1.0 M KOH with or without a 0.33 M urea solution. Linear sweep voltammetry (LSV) curves were recorded over a range from 0 to 0.8 V (vs. Hg/HgO) at a scan rate of 5 mV s<sup>-1</sup>. Operando EIS was conducted within a frequency range spanning from 10<sup>-2</sup> to 10<sup>5</sup> Hz, utilizing an AC amplitude of 10 mV by ModuLab XM electrochemical system from Solartron Analytical.

For temperature-dependent measurements, a thermostatic water bath was employed to maintain controlled temperatures. The apparent electrochemical activation energy ( $E_a$ ) for UOR was determined by Arrhenius relationship:<sup>2</sup>

$$\left. \frac{\partial(\log i_k)}{\partial(1/T)} \right| = \frac{E_a}{2.3R}$$

where  $i_k$  represents the kinetic current at a potential of 1.70 V (vs. RHE) under varying temperatures, T signifies the reaction temperature (K), and R stands for the universal gas constant. Arrhenius plots were constructed, and the  $E_a$  value was extracted from the slope of these plots.

## Figures

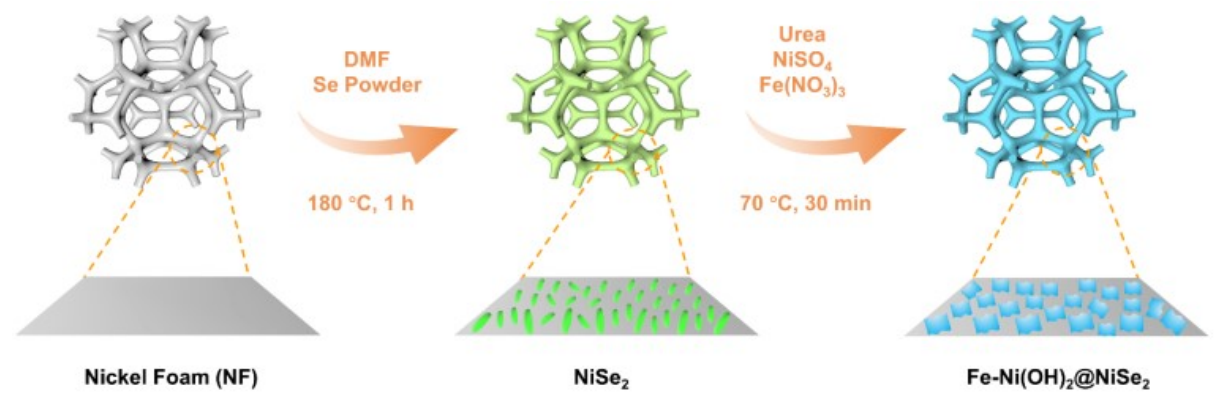

Scheme S1. Preparation process of Fe-Ni(OH)<sub>2</sub>@NiSe<sub>2</sub> electrocatalyst.

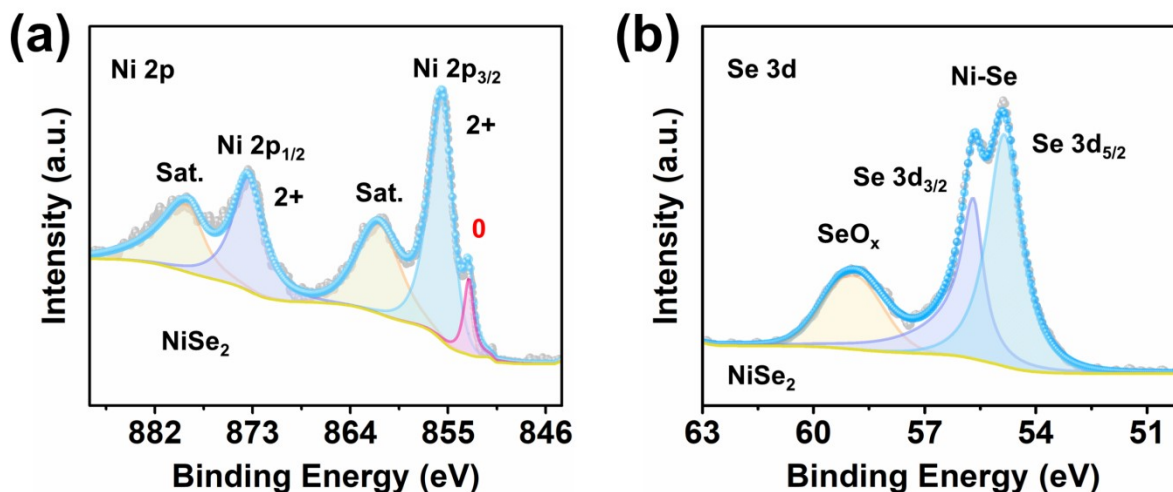

**Fig. S1.** XPS spectra of NiSe<sub>2</sub>. (a) Ni 2p and (b) Se 3d.

In the case of NiSe<sub>2</sub>, the Ni 2p spectra (**Fig.S1a**) displayed binding energy (BE) at 853.04 eV (Ni<sup>0</sup>) and 855.49 eV (Ni<sup>2+</sup>) as well as 870.14 eV (Ni<sup>0</sup>) and 873.42 eV (Ni<sup>2+</sup>) attributed to Ni 2p<sub>3/2</sub> and Ni 2p<sub>1/2</sub>,<sup>3</sup> respectively. Concerning the Se 3d spectra (**Fig.S1b**), the BE at 54.85 and 55.70 eV assigned to Se 3d<sub>5/2</sub> and Se 3d<sub>3/2</sub>, respectively, suggesting the existence of Ni-Se bonds and Se.<sup>2-4</sup> Furthermore, a BE around 58.9 eV indicates the presence of selenium oxide species.<sup>5</sup>

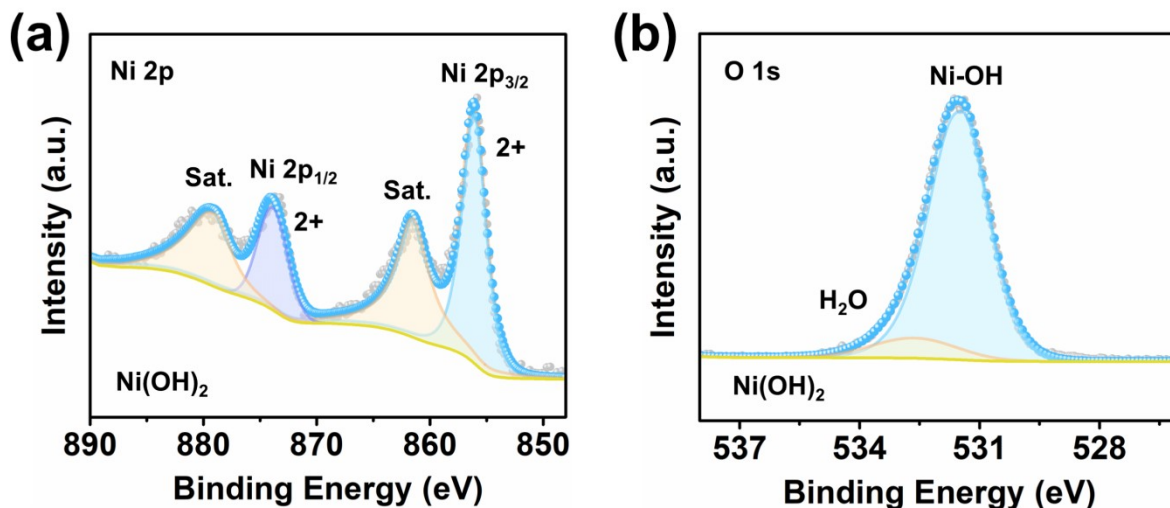

**Fig. S2.** XPS spectra of Ni(OH)<sub>2</sub>. (a) Ni 2p and (b) O 1s.

In the case of Ni(OH)<sub>2</sub>, the Ni 2p spectra (**Fig.S2a**) exhibited BE at 856.11 eV (Ni 2p<sub>3/2</sub>) and 873.87 eV (Ni 2p<sub>1/2</sub>), characteristic of Ni<sup>2+</sup>.<sup>6</sup> For the O1s spectra (**Fig.S2b**), the BE at 531.44 and 532.63 eV linked to Ni-OH and absorbed H<sub>2</sub>O from air,<sup>7</sup> respectively.

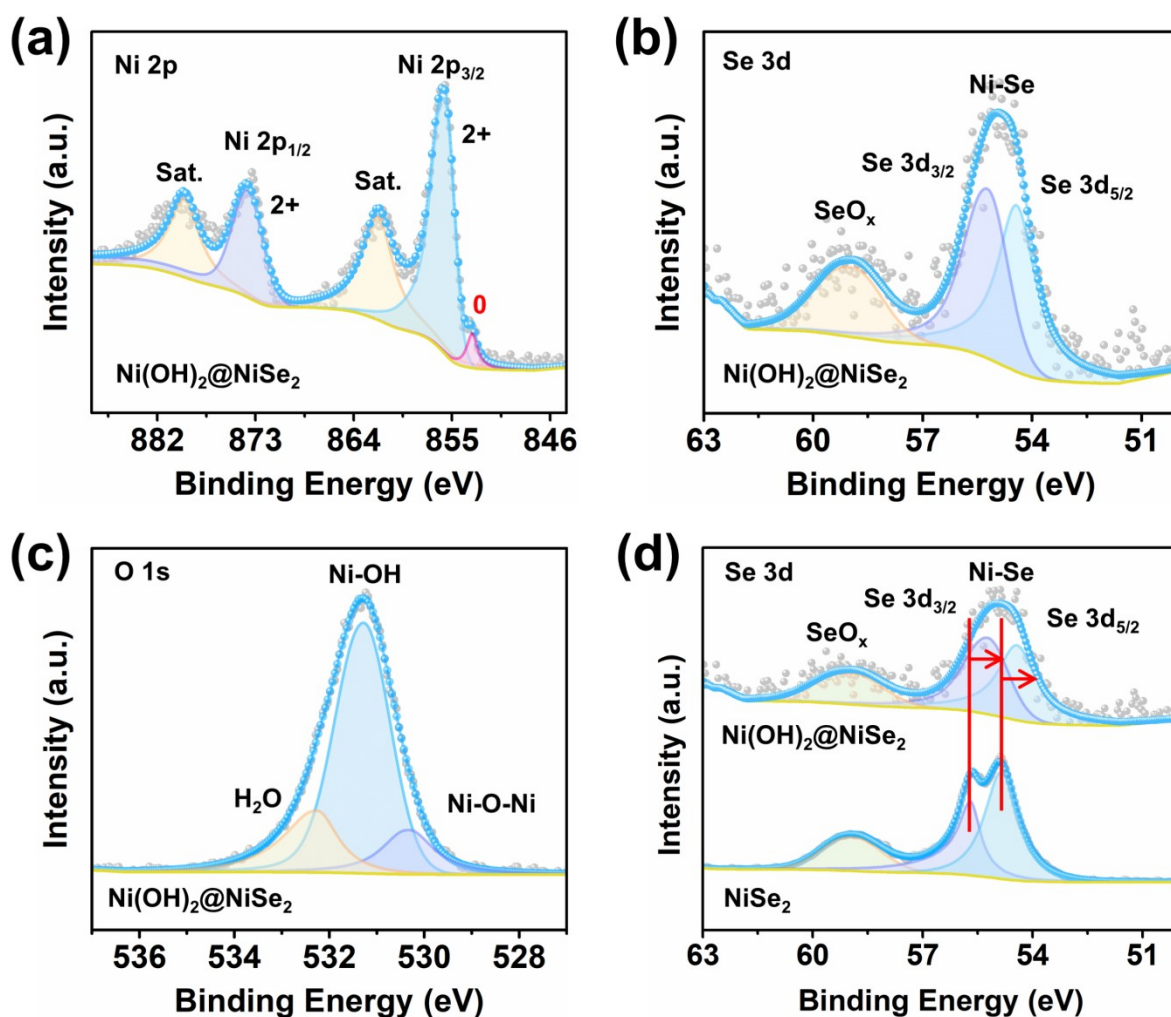

**Fig. S3.** XPS spectra of Ni(OH)<sub>2</sub>@NiSe<sub>2</sub> heterojunction. (a) Ni 2p, (b) Se 3d, and (c) O 1s. (d) XPS spectra of Se 3d in NiSe<sub>2</sub> and Ni(OH)<sub>2</sub>@NiSe<sub>2</sub>.

Notably, the Ni(OH)<sub>2</sub>@NiSe<sub>2</sub> heterojunction revealed a more complex Ni 2p<sub>3/2</sub> spectrum, as shown in **Fig.S3a**, with three peaks at 853.16, 855.69 and 861.77 eV were attributed to the Ni<sup>0</sup>, Ni<sup>2+</sup> and satellite peaks,<sup>8</sup> respectively. Correspondingly, the Ni 2p<sub>1/2</sub> spectrum exhibited fitted peaks at 873.74 and 879.55 eV, associated with Ni<sup>2+</sup> and satellite peaks,<sup>9</sup> respectively. The Se 3d spectra (**Fig.S3b**) displayed BE of 54.42 and 55.22 eV corresponding to Se 3d<sub>5/2</sub> and Se 3d<sub>3/2</sub>, elucidating the presence of Ni-Se bonds. For the O 1s spectra (**Fig.S3c**), the BE at 530.99, 531.58 and 532.86 eV were consistent with Ni-O-Ni, Ni-OH/oxygen vacancy and absorbed H<sub>2</sub>O from air, respectively. It is noteworthy that the Se 3d spectrum of



$\text{Ni(OH)}_2@\text{NiSe}_2$  was shifted towards the lower binding energy relative to the that of  $\text{NiSe}_2$  (**Fig.S3d**) compared to pure  $\text{NiSe}_2$ , signifying that the electrons transfer from  $\text{Ni(OH)}_2$  to the surface  $\text{NiSe}_2$ , culminating in the establishment of a stable heterogeneous interface with a strong electron interaction between  $\text{Ni(OH)}_2$  and  $\text{NiSe}_2$ .

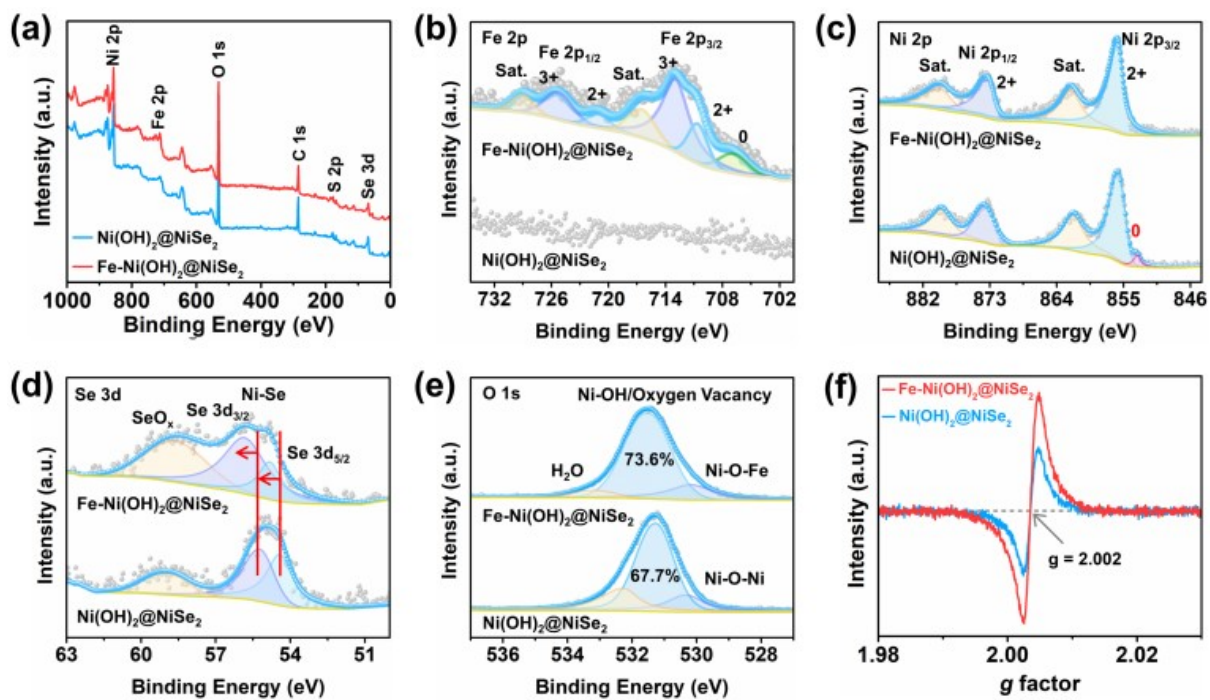

**Fig. S4.** (a) XPS survey. XPS spectra of (b) Fe 2p, (c) Ni 2p, (d) Se 3d, and (e) O 1s in both Ni(OH)<sub>2</sub>@NiSe<sub>2</sub> and Fe-Ni(OH)<sub>2</sub>@NiSe<sub>2</sub>. (f) EPR.

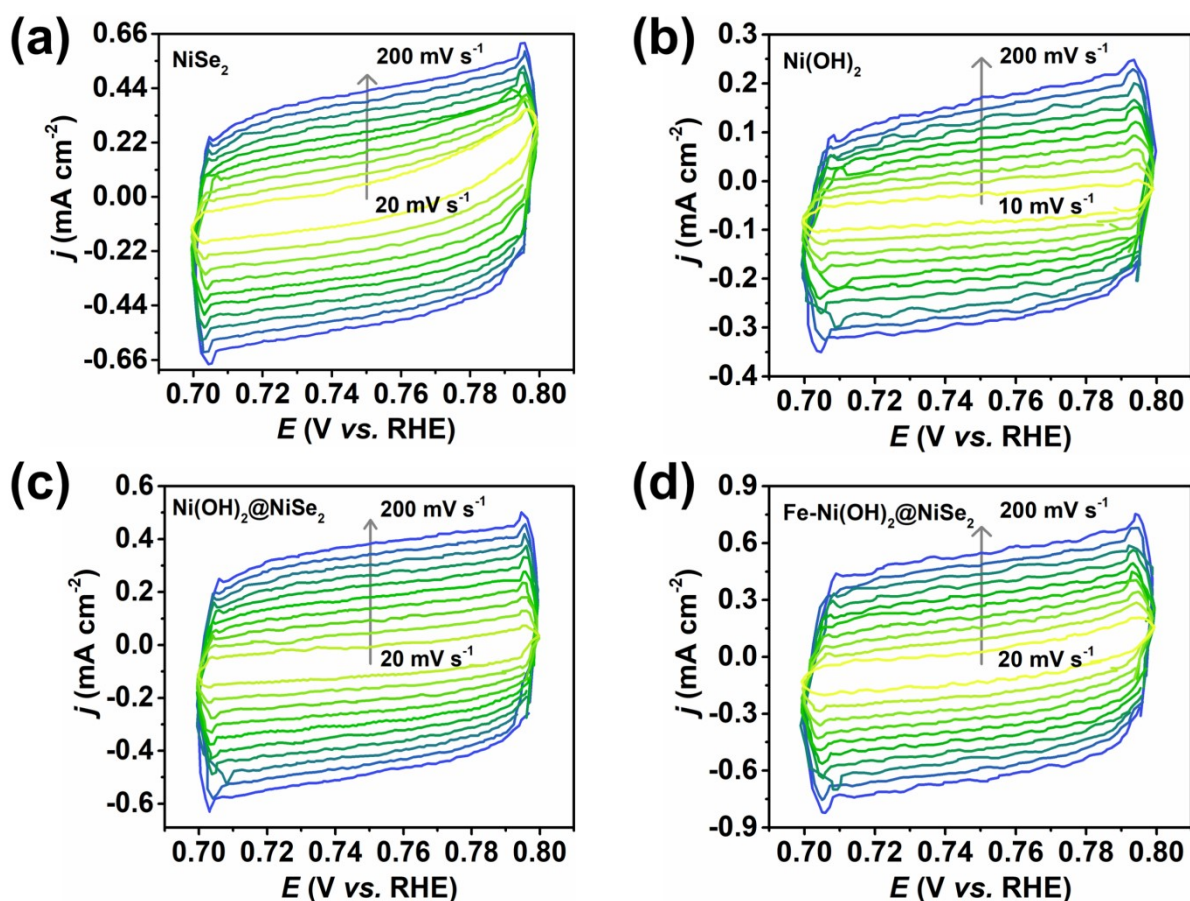

**Fig. S5.** Electrochemical double-layer capacitance ( $C_{dl}$ ) of (a)  $\text{NiSe}_2$ , (b)  $\text{Ni(OH)}_2$ , (c)  $\text{Ni(OH)}_2@/\text{NiSe}_2$ , and (d)  $\text{Fe-Ni(OH)}_2@/\text{NiSe}_2$ .

ECSA was determined by measuring the capacitive current associated with double-layer charging from the scan-rate dependence of CVs. For this, the potential window of CVs was 0.7 ~ 0.8 V vs. RHE. The scan rates were 20, 40, 60, 80, 100, 120, 140, 160, 180 and 200  $\text{mV s}^{-1}$ . The double-layer capacitance ( $C_{dl}$ ) was estimated by plotting the  $\Delta J = J_a - J_c$  against the scan rate. The linear slope is twice of the double layer capacity. The ECSA values were calculated from the measured double layer capacitance divided by the specific capacitance ( $C_s$ ;  $\sim 40 \mu\text{F cm}^{-2}$ ) via  $\text{ECSA} = C_{dl}/C_s^{10}$ .

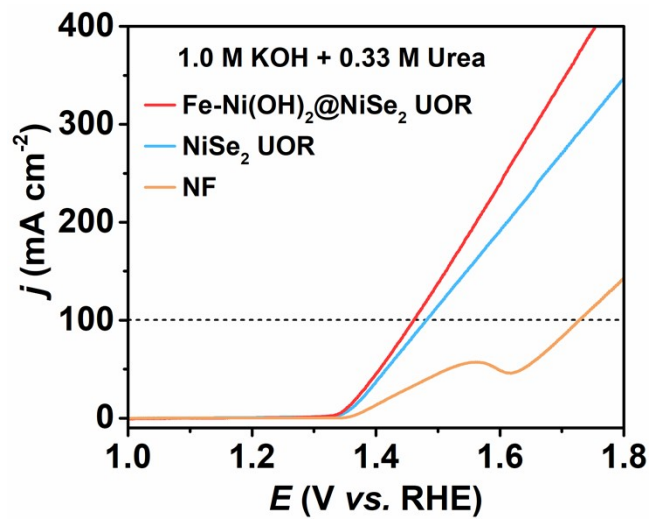

**Fig. S6.** LSV curves of NF, NiSe<sub>2</sub>, and Fe-Ni(OH)<sub>2</sub>@NiSe<sub>2</sub>.

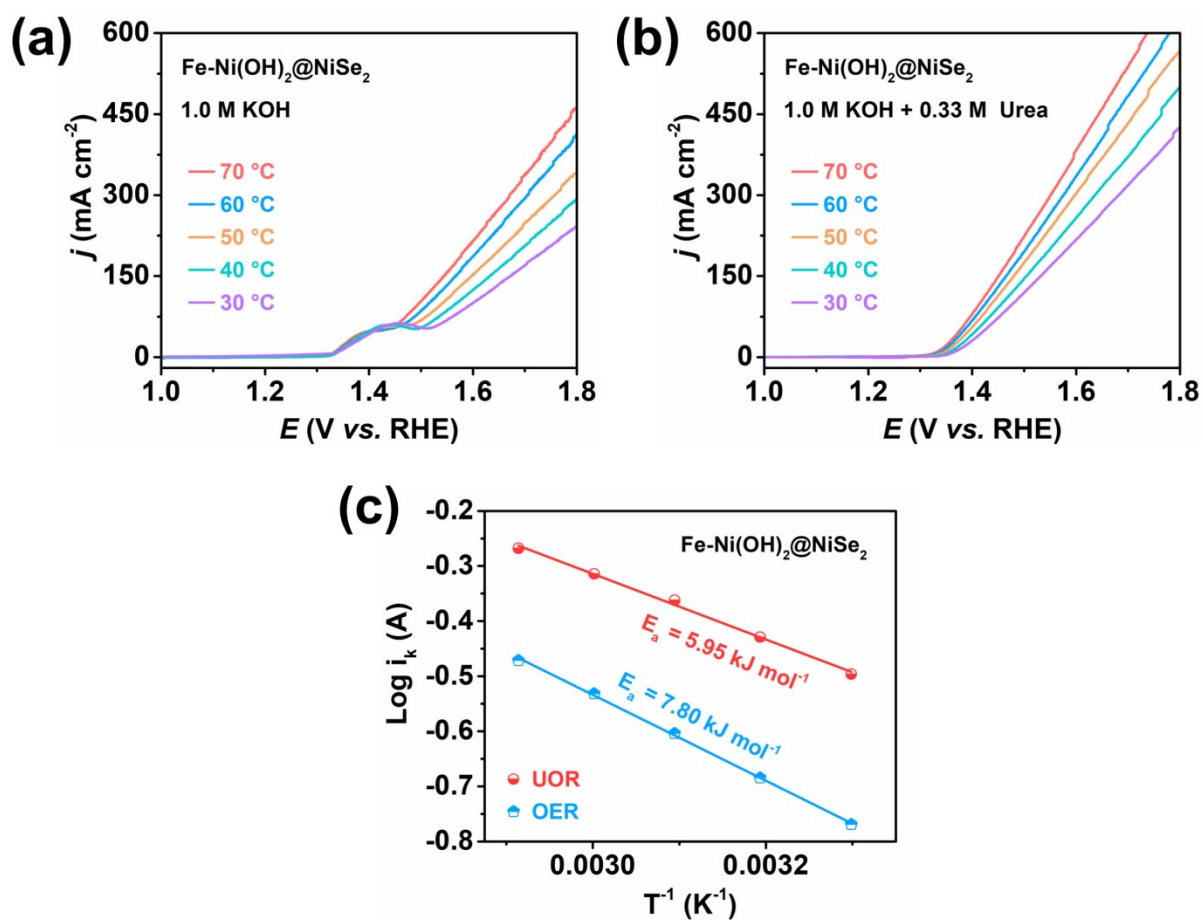

**Fig. S7.** Temperature-dependent electrocatalytic performances of Fe-Ni(OH)<sub>2</sub>@NiSe<sub>2</sub> in (a) 1.0 M KOH, and (b) in 1 M KOH with 0.33 M urea at 30 °C, 40 °C, 50 °C, 60 °C, and 70 °C, respectively. (c) Arrhenius plot of Fe-Ni(OH)<sub>2</sub>@NiSe<sub>2</sub> in 1.0 M KOH (*i.e.*, UOR) and without (*i.e.*, OER) 0.33 M urea, at 1.70 V vs. RHE.

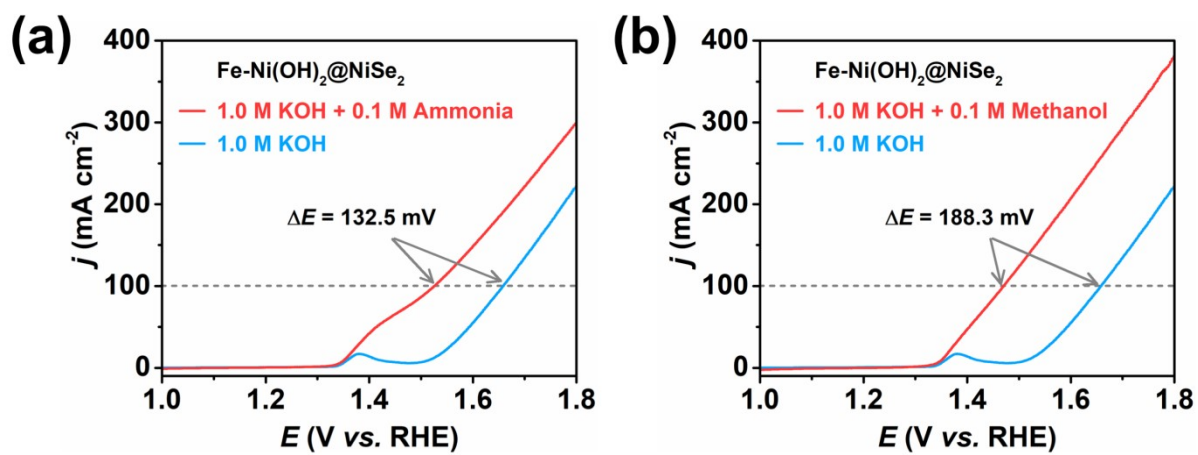

**Fig. S8.** The LSV curves of Fe-Ni(OH)<sub>2</sub>@NiSe<sub>2</sub> in 1.0 M KOH with and without the addition of (a) 0.1 M ammonia and (b) methanol.

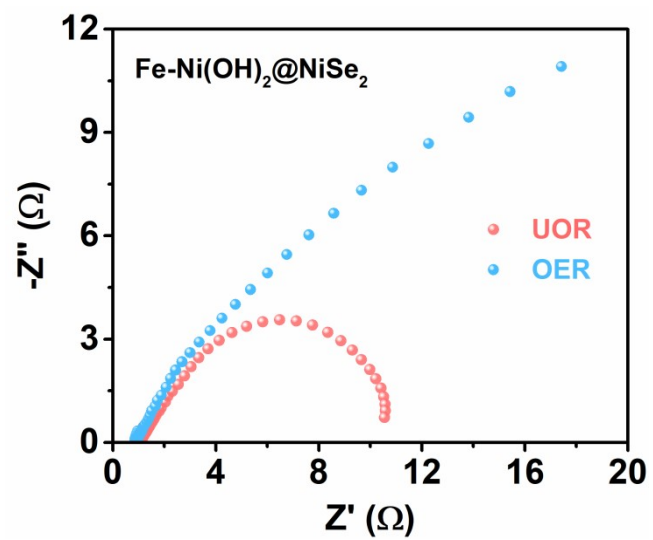

**Fig. S9.** Nyquist plots of the OER (1 M KOH) and UOR (1 M KOH with 0.33 M urea) for Fe-Ni(OH)<sub>2</sub>@NiSe<sub>2</sub>.

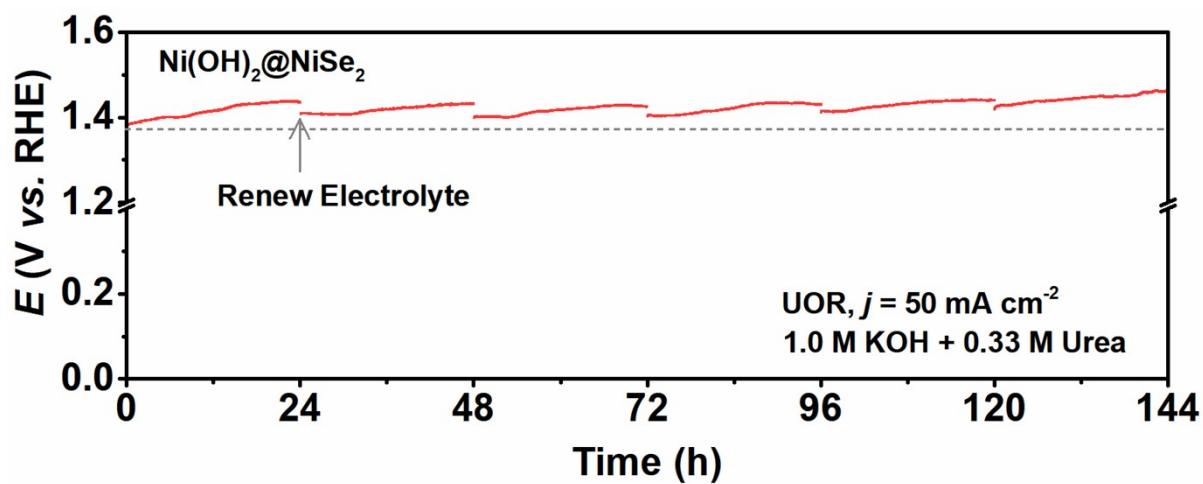

Fig. S10. Chronopotentiometry test of Ni(OH)<sub>2</sub>@NiSe<sub>2</sub> in 1.0 M KOH with 0.33 M urea.



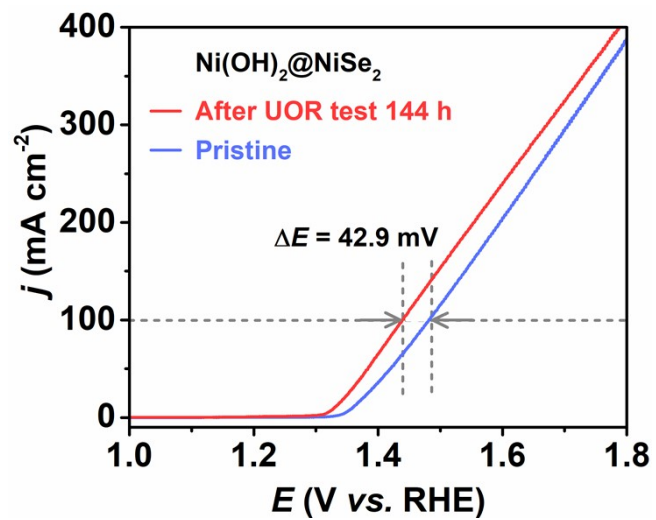

**Fig.S11.** LSV curves of Ni(OH)<sub>2</sub>@NiSe<sub>2</sub> in 1.0 M KOH with 0.33 M urea.

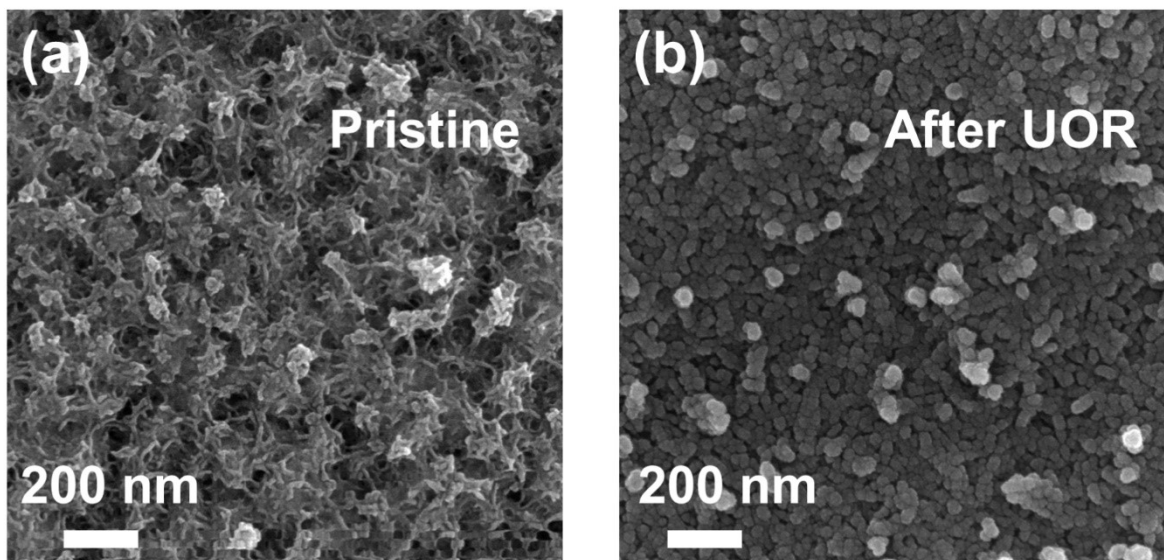

**Fig. S12.** SEM images of Fe-Ni(OH)<sub>2</sub>@NiSe<sub>2</sub> both (a) pristine and (b) after UOR.

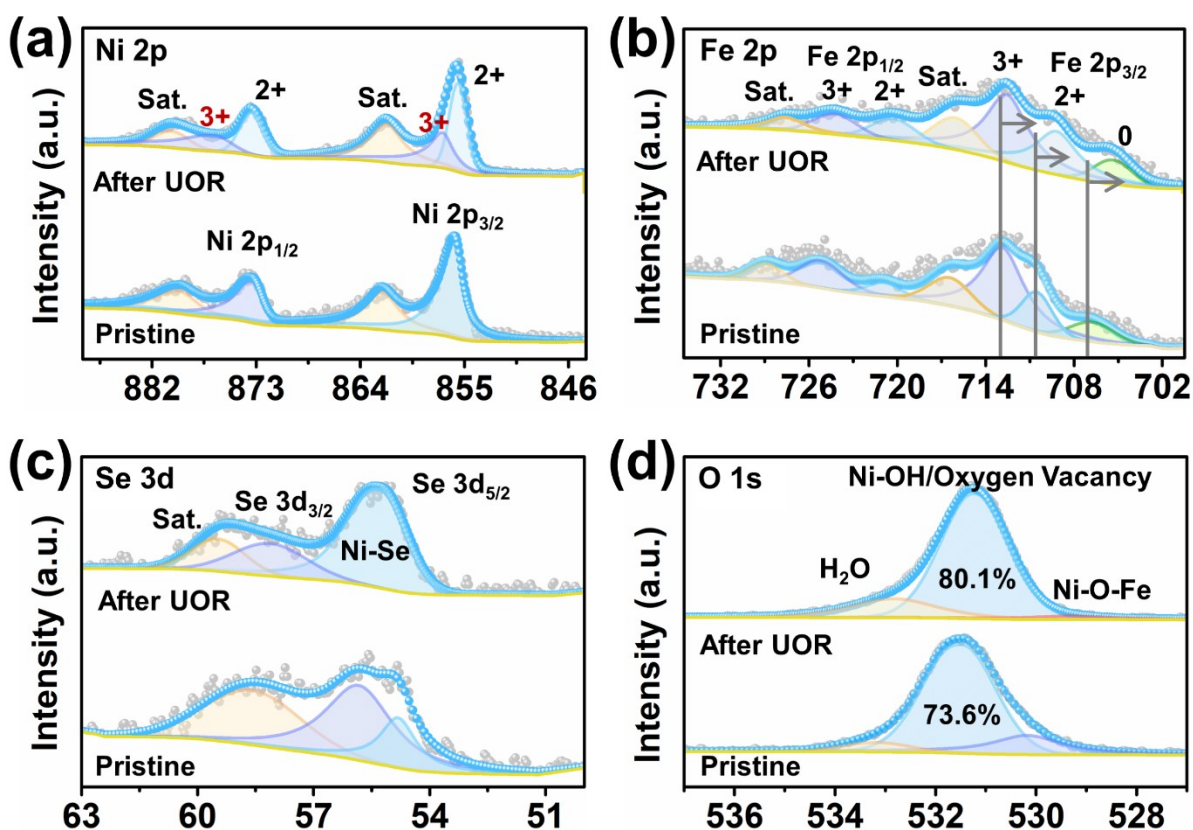

Fig. S13. XPS spectrum of Fe-Ni(OH)<sub>2</sub>@NiSe<sub>2</sub> both pristine and after UOR. (a) Ni 2p, (b) Fe 2p, (c) Se 3d, and (d) O 1s, respectively.

Fig. S13 reveals the changes of catalyst in chemical composition before and after participates in the UOR process. After the UOR process, a characteristic peak corresponding to Ni<sup>3+</sup> was observed in the Ni 2p orbitals, indicating the oxidation of Ni to a high-valent nickel species (Ni<sup>3+</sup>). In the Fe 2p orbitals, the presence of zero-valent Fe suggests that Fe acts as an electron acceptor, facilitating the oxidation of Ni to a high-valent Ni species. In the Se 3d orbitals, a leftward shift in the binding energy positions of Se 3d<sub>3/2</sub> and Se 3d<sub>5/2</sub> indicates the oxidation of Se during the electrochemical process. In the O 1s orbitals, the increase in the content of O-H bonds observed indicates the generation of more NiOOH species during the electrochemical process.

## References

1. L. Zhai, T. W. Benedict Lo, Z. Xu, J. Potter, J. Mo, X. Guo, C. C. Tang, S. C. Edman Tsang and S. P. Lau, *ACS Energy Lett*, 2020, **5**, 2483-2491.
2. Q. Wen, Y. Lin, Y. Yang, R. Gao, N. Ouyang, D. Ding, Y. Liu and T. Zhai, *ACS Nano*, 2022, **16**, 9572-9582.
3. Z. Ye, P. Li, W. Wei, C. Huang, L. Mi, J. Zhang and J. Zhang, *Adv Sci*, 2022, **9**, e2200067.
4. S. F. Zai, X. Y. Gao, C. C. Yang and Q. Jiang, *Adv Energy Mater*, 2021, **11**, 2101266.
5. K. Huang, C. Lin, G. Yu, P. Du, X. Xie, X. He, Z. Zheng, N. Sun, H. Tang, X. Li, M. Lei and H. Wu, *Adv Funct Mater*, 2022, **33**, 2211102.
6. W. Wang, Y. Wang, R. Yang, Q. Wen, Y. Liu, Z. Jiang, H. Li and T. Zhai, *Angew Chem Int Edit*, 2020, **59**, 16974-16981.
7. B. Zhou, Y. Li, Y. Zou, W. Chen, W. Zhou, M. Song, Y. Wu, Y. Lu, J. Liu, Y. Wang and S. Wang, *Angew Chem Int Edit*, 2021, **60**, 22908-22914.
8. N. Chen, Y. X. Du, G. Zhang, W. T. Lu and F. F. Cao, *Nano Energy*, 2021, **81**, 105605.
9. Q. Sun, L. Wang, Y. Shen, M. Zhou, Y. Ma, Z. Wang and C. Zhao, *ACS Sustainable Chem Eng*, 2018, **6**, 12746-12754.
10. P. Liu, B. Chen, C. W. Liang, W. T. Yao, Y. Z. Cui, S. Y. Hu, P. C. Zou, H. Zhang, H. J. Fan and C. Yang, *Adv Mater*, 2021, **33**, 2007377.
